# Supplementary material for: Comprehensive Evaluation of the m6A Regulator Prognostic Risk Score in the Prediction of Immunotherapy Response in Clear Cell Renal Cell Carcinoma
Source: Front Immunol. 2022 Jun 17;13:818120. doi: 10.3389/fimmu.2022.818120 (PMC9248360; doi:10.3389/fimmu.2022.818120)
Supplement: Supplementary file 3 [file Table_2.xlsx]

## Sheet: Sheet1
R package	Algorithms	Function
Seurat	https://github.com/satijalab/seurat	Tools for single cell genomics
pheatmap	https://github.com/raivokolde/pheatmap	A package for drawing pretty heatmaps in R
maftools	https://github.com/PoisonAlien/maftools	Summarize,Analysis and Visualize MAF files
presto	https://github.com/immunogenomics/presto	Fast Functions for Differential Expression using Wilcox and AUC
harmony	https://github.com/immunogenomics/harmony	Fast, Sensitive, and Accurate Integration of Single Cell Data
singleseqgset	https://github.com/arc85/singleseqgset	Single-cell Gene Set Enrichment Analysis
clusterProfiler	https://github.com/YuLab-SMU/clusterProfiler	statistical analysis and visualization of functional profiles for genes and gene clusters
survminer	https://github.com/kassambara/survminer	Drawing Survival Curves using 'ggplot2'
survival	https://github.com/therneau/survival	Survival analysis
forestplot	https://github.com/gforge/forestplot	Advanced Forest Plot Using 'grid' Graphics
edgeR	https://github.com/Edger/edger.github.io	Empirical Analysis of Digital Gene Expression Data in R
ggplot2	https://github.com/tidyverse/ggplot2	Create Elegant Data Visualisations Using the Grammar of Graphic
mMCPcounter	https://github.com/cit-bioinfo/mMCP-counter	Estimate the immune and stromal composition of heterogeneous tissue, from transcriptomic data.
ssGSEA	https://github.com/broadinstitute/ssGSEA2.0	Resources for gene-centric single sample Gene Set Enrichment Analysis (ssGSEA) of gene expression data
